# Supplementary material for: Prevalence and socioeconomic determinants of the double burden of malnutrition in mother–child pairs in Latin America and the Caribbean
Source: PubMed Central journal article supplement — BMJ Nutr Prev Health. 2022 Oct 25;5(2):263–70. doi: 10.1136/bmjnph-2022-000489 (PMC9813618; doi:10.1136/bmjnph-2022-000489), 2022-10-25
Supplement: bmjnph-2022-000489supp001.pdf [file bmjnph-2022-000489supp001.pdf]

## Supplementary material

### Appendices

#### Appendix A

Figure 1. Participant Flow Diagram, n: total number of participants

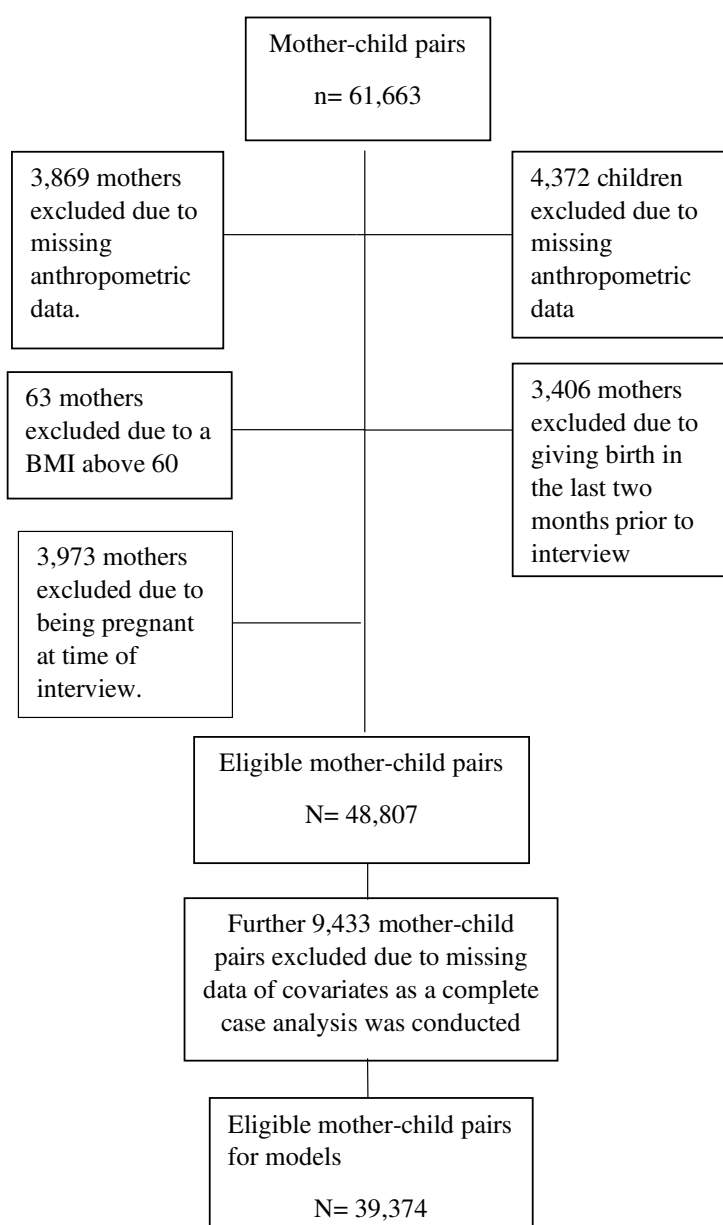

## Appendix B

### Missing data explanation

| Missing data                                   |                                                                                                                                                                                                                                          |
|------------------------------------------------|------------------------------------------------------------------------------------------------------------------------------------------------------------------------------------------------------------------------------------------|
| <b>BMI (n= 3,932)</b>                          | <ul style="list-style-type: none"> <li>○ 3,869 missing data</li> <li>○ 63 outside of plausible limits</li> </ul>                                                                                                                         |
| <b>Anaemia level mother (n= 28,999)</b>        | <ul style="list-style-type: none"> <li>○ No data for Colombia, Dominican Republic, and Nicaragua</li> <li>○ 6,610 missing data</li> </ul>                                                                                                |
| <b>Anaemia level children (n= 31,793)</b>      | <ul style="list-style-type: none"> <li>○ No data for Colombia, Dominican Republic, and Nicaragua</li> <li>○ 9,404 missing data</li> <li>○ Only children aged 6-59 months included, so children younger than 6 months excluded</li> </ul> |
| <b>Stunting children (n= 4,372)</b>            | <ul style="list-style-type: none"> <li>○ 528 outside of plausible limits</li> <li>○ 3,844 missing data</li> </ul>                                                                                                                        |
| <b>Wasting children (n= 4,393)</b>             | <ul style="list-style-type: none"> <li>○ 540 outside of plausible limits</li> <li>○ 3,853 missing data</li> </ul>                                                                                                                        |
| <b>Age children (n= 859)</b>                   | <ul style="list-style-type: none"> <li>○ 859 missing data</li> </ul>                                                                                                                                                                     |
| <b>Husband at home (n= 11,954)</b>             | <ul style="list-style-type: none"> <li>○ 11,954 missing data</li> </ul>                                                                                                                                                                  |
| <b>Mother working in last 12-months (n=14)</b> | <ul style="list-style-type: none"> <li>○ 14 missing data</li> </ul>                                                                                                                                                                      |

Note. n: total missing values

## Appendix C

### Study Characteristics per Country

|                             | Countries                                   | Bolivia | Columbia | Dom. Rep. | Guatemala | Guyana | Honduras | Haiti   | Nicaragua | Peru  | Total  |
|-----------------------------|---------------------------------------------|---------|----------|-----------|-----------|--------|----------|---------|-----------|-------|--------|
|                             | <b>Year</b>                                 | 2008    | 2010     | 2013      | 2014-15   | 2009   | 2011-12  | 2016-17 | 2001      | 2012  |        |
|                             | <b>Sample, total</b>                        | 5,163   | 11,688   | 2,287     | 7,970     | 1,042  | 7,220    | 2,545   | 3,867     | 7,025 | 48,807 |
|                             | <b>SCOM (%)</b>                             | 13.08   | 5.30     | 3.22      | 21.14     | 6.59   | 9.77     | 4.86    | 9.29      | 10.08 | 10.44  |
|                             | <b>Urban (%)</b>                            | 57.74   | 73.73    | 74.89     | 37.92     | 24.26  | 47.57    | 37.67   | 53.33     | 66.91 | 55.87  |
|                             | <b>Husband living at home (%)</b>           | 91.47   | 93.41    | 91.48     | 84.75     | 88.71  | 91.81    | 66.85   | 93.06     | 94.25 | 89.00  |
|                             | <b>Mother working in last 12-months (%)</b> | 71.16   | 62.79    | 57.53     | 39.54     | 34.52  | 49.73    | 66.92   | 40.79     | 68.02 | 56.41  |
| <b>Mean Household Value</b> | <b>Wealth index (1-5)</b>                   | 2.85    | 2.77     | 2.85      | 2.80      | 2.80   | 2.37     | 2.89    | 2.82      | 2.79  | 2.82   |
|                             | <b>Maternal education level (0-3)</b>       | 0.94    | 1.56     | 1.50      | 0.65      | 1.26   | 0.90     | 0.67    | 0.75      | 1.59  | 1.11   |

|                                          |       |       |       |       |       |       |       |       |       |       |
|------------------------------------------|-------|-------|-------|-------|-------|-------|-------|-------|-------|-------|
| <b>Number of children at home (0-11)</b> | 1.48  | 1.36  | 1.31  | 1.43  | 1.49  | 1.41  | 1.47  | 1.72  | 1.32  | 1.42  |
| <b>Age mother (13-49)</b>                | 29.20 | 27.81 | 27.16 | 27.89 | 27.78 | 27.48 | 29.82 | 27.23 | 29.75 | 28.26 |
| <b>Children age (0-4)</b>                | 1.98  | 2.03  | 2.01  | 1.99  | 1.87  | 1.93  | 1.99  | 1.97  | 2.02  | 1.99  |
| <b>Mean percentage girls</b>             | 0.49  | 0.48  | 0.49  | 0.47  | 0.50  | 0.48  | 0.49  | 0.49  | 0.49  | 0.48  |

*Note.* SCOM: Overweight/obese mother with at least one stunted child.

## Appendix D

### Outcome Prevalence per Countries

|                  | <i>Overweight<br/>(mother)</i> | <i>Stunting</i>  | <i>SCOM</i>        | <i>wasting</i>   | <i>WCOM</i>        | <i>Anaemic<br/>(child)</i> | <i>ACOM</i>       | <i>Overweight<br/>(child)</i> | <i>Anaemic<br/>(mother)</i> | <i>OCAM</i>       |
|------------------|--------------------------------|------------------|--------------------|------------------|--------------------|----------------------------|-------------------|-------------------------------|-----------------------------|-------------------|
| <b>%</b>         | 49.56                          | 25.03            | 10.44              | 1.74             | 0.48               | 42.20                      | 19.39             | 6.93                          | 22.51                       | 5.76              |
| <b>missing</b>   | 10,026<br>(16.26%)             | 4,372<br>(7.09%) | 12,856<br>(20.85%) | 4,399<br>(7.13%) | 12,866<br>(20.87%) | 31,792<br>(51.51%)         | 35,979<br>(58.35) | 4,399<br>(7.13%)              | 28,999<br>(47.03%)          | 53,156<br>(86.20) |
| <b>Bolivia</b>   | 51.55                          | 29.49            | 13.08              | 1.78             | 0.47               | 67.18                      | 33.21             | 10.49                         | 42.64                       | 9.416             |
| <b>Columbia</b>  | 44.12                          | 13.91            | 5.30               | 1.06             | 0.23               | /                          | /                 | 5.56                          | /                           | /                 |
| <b>Dom. Rep.</b> | 49.82                          | 7.85             | 3.22               | 2.26             | 0.76               | /                          | /                 | 8.85                          | /                           | /                 |
| <b>Guatemala</b> | 52.37                          | 48.24            | 21.14              | 0.95             | 0.40               | 37.07                      | 17.55             | 5.91                          | 15.43                       | 5.58              |
| <b>Guyana</b>    | 48.32                          | 20.55            | 6.59               | 6.08             | 1.41               | 42.39                      | 20.52             | 8.39                          | 38.24                       | 3.73              |
| <b>Honduras</b>  | 51.59                          | 23.48            | 9.77               | 1.62             | 0.60               | 32.31                      | 16.01             | 6.24                          | 14.31                       | 4.28              |
| <b>Haiti</b>     | 34.74                          | 23.35            | 4.89               | 4.58             | 1.23               | 69.99                      | 23.33             | 4.32                          | 49.15                       | 4.5               |
| <b>Nicaragua</b> | 46.44                          | 26.9             | 9.29               | 2.77             | 0.61               | /                          | /                 | 8.14                          | /                           | 6/                |
| <b>Peru</b>      | 59.57                          | 18.55            | 10.08              | 0.79             | 0.27               | 34.99                      | 19.63             | 8.25                          | 19.7                        | 6.62              |

*Note.* SCOM: Overweight/obese mother with at least one stunted child. WCOM: Overweight/obese mother with at least one wasted child. ACOM: Overweight/obese mother with at least one anaemic child. OCAM: Anaemic mother with at least one overweight/obese child

## Appendix E

Prevalence (%) per outcome

|                                                  | SCOM             | WCOM   | ACOM             | OCAM             |
|--------------------------------------------------|------------------|--------|------------------|------------------|
| <b>Total</b>                                     | 48,807           | 48,797 | 25,684           | 8,507            |
| <b>Households with DBM</b>                       | 5,246            | 241    | 5,062            | 451              |
| <b>Prevalence (%)</b>                            | 10.44            | 0.48   | 19.39            | 5.76             |
| <b>Location of Residency; p-value</b>            | <b>&lt;0.001</b> | 0.3056 | 0.1225           | <b>&lt;0.001</b> |
| Urban                                            | 8.11             | 0.44   | 19.93            | 6.93             |
| Rural                                            | 13.44            | 0.52   | 18.90            | 4.74             |
| <b>Maternal education level; p-value</b>         | <b>&lt;0.001</b> | 0.1278 | <b>&lt;0.001</b> | <b>&lt;0.001</b> |
| No education/incomplete primary                  | 17.79            | 0.58   | 20.87            | 5.50             |
| Primary/incomplete secondary                     | 8.99             | 0.51   | 19.03            | 4.55             |
| Secondary                                        | 5.13             | 0.34   | 18.83            | 5.99             |
| Higher                                           | 4.11             | 0.32   | 16.25            | 10.85            |
| <b>Wealth index, p-value</b>                     | <b>&lt;0.001</b> | 0.3293 | <b>&lt;0.001</b> | <b>&lt;0.001</b> |
| Poorest                                          | 14.82            | 0.55   | 17.61            | 5.05             |
| Poorer                                           | 12.50            | 0.33   | 19.15            | 4.61             |
| Middle                                           | 10.59            | 0.48   | 22.16            | 4.63             |
| Richer                                           | 7.08             | 0.54   | 20.79            | 6.59             |
| Richest                                          | 5.05             | 0.51   | 16.68            | 8.80             |
| <b>Mother working in last 12-months, p-value</b> | <b>&lt;0.001</b> | 0.5217 | 0.0902           | 0.8378           |
| No                                               | 11.47            | 0.51   | 18.83            | 5.69             |
| Yes                                              | 9.65             | 0.48   | 19.86            | 5.82             |

Note. p-value: according to chi-square test ( $X^2$ ), bold: significant ( $p < 0.05$ ). SCOM: Overweight/obese mother with at least one stunted child. WCOM: Overweight/obese mother with at least one wasted child. ACOM: Overweight/obese mother with at least one anaemic child. OCAM: Anaemic mother with at least one overweight/obese child.

## Appendix F

*Distribution (%) per outcome across location of residency, maternal education level, wealth index, and whether the mother was working in the last 12-months (per column)*

|                                                           | SCOM             | WCOM   | ACOM             | OCAM             |
|-----------------------------------------------------------|------------------|--------|------------------|------------------|
| <b>% Location of Residency; <i>p</i>-value</b>            | <b>&lt;0.001</b> | 0.3056 | 0.1225           | <b>&lt;0.001</b> |
| <i>Urban</i>                                              | 43.8             | 52.28  | 49.15            | 56.04            |
| <i>Rural</i>                                              | 56.2             | 47.72  | 50.85            | 43.96            |
| <b>% Maternal education level; <i>p</i>-value</b>         | <b>&lt;0.001</b> | 0.1278 | <b>&lt;0.001</b> | <b>&lt;0.001</b> |
| <i>No education/incomplete primary</i>                    | 54.13            | 38.39  | 39.09            | 34.7             |
| <i>Primary/incomplete secondary</i>                       | 31.72            | 39.24  | 38.72            | 30.94            |
| <i>Secondary</i>                                          | 8.99             | 13     | 13.97            | 14.63            |
| <i>Higher</i>                                             | 5.15             | 9.36   | 8.22             | 19.72            |
| <b>% Wealth index, <i>p</i>-value</b>                     | <b>&lt;0.001</b> | 0.3293 | <b>&lt;0.001</b> | <b>&lt;0.001</b> |
| <i>Poorest</i>                                            | 31.81            | 25.93  | 20.67            | 21.5             |
| <i>Poorer</i>                                             | 25.99            | 14.94  | 21.26            | 16.48            |
| <i>Middle</i>                                             | 21.77            | 21.29  | 24.08            | 16.19            |
| <i>Richer</i>                                             | 13.18            | 21.79  | 21.27            | 21.69            |
| <i>Richest</i>                                            | 7.25             | 16.05  | 12.72            | 24.13            |
| <b>% Mother working in last 12-months, <i>p</i>-value</b> | <b>&lt;0.001</b> | 0.5217 | 0.0902           | 0.8378           |
| <i>No</i>                                                 | 47.56            | 45.82  | 43.89            | 44.33            |
| <i>Yes</i>                                                | 52.44            | 54.18  | 56.11            | 55.67            |

*Note.* *p*-value: according to chi-square test ( $X^2$ ), bold: significant ( $p < 0.05$ ). SCOM: Overweight/obese mother with at least one stunted child. WCOM: Overweight/obese mother with at least one wasted child. ACOM: Overweight/obese mother with at least one anaemic child. OCAM: Anaemic mother with at least one overweight/obese child.

## Appendix G

Age Stratified Multiple Logistic Regression Analysis with SCOM (Overweight/obese mother with at least one stunted child) as Outcome

|                                              | <b>Model 1</b><br><i>(All ages)</i><br><b>n: 39,374</b> | <b>Model 2</b><br><i>(Below two)</i><br><b>n: 26,891</b> | <b>Model 3</b><br><i>(Three and above)</i><br><b>n: 19,409</b> |
|----------------------------------------------|---------------------------------------------------------|----------------------------------------------------------|----------------------------------------------------------------|
|                                              | <b>OR (95%-CI)</b>                                      | <b>OR (95%-CI)</b>                                       | <b>OR (95%-CI)</b>                                             |
| <b>Maternal education level</b>              |                                                         |                                                          |                                                                |
| <i>No education/<br/>incomplete primary</i>  | 1.00 (Ref.)                                             | 1.00 (Ref.)                                              | 1.00 (Ref.)                                                    |
| <i>Primary/incomplete<br/>secondary</i>      | 0.72 (0.65-0.80)*                                       | 0.78 (0.73-0.84)*                                        | 0.69 (0.60-0.80)*                                              |
| <i>Secondary</i>                             | 0.47 (0.43-0.51)*                                       | 0.51 (0.49-0.54)*                                        | 0.41 (0.33-0.52)*                                              |
| <i>Higher</i>                                | 0.45 (0.34-0.59)*                                       | 0.49 (0.41-0.58)*                                        | 0.41 (0.23-0.74)*                                              |
| <b>Wealth index</b>                          |                                                         |                                                          |                                                                |
| <i>Poorest</i>                               | 1.00 (Ref.)                                             | 1.00 (Ref.)                                              | 1.00 (Ref.)                                                    |
| <i>Poorer</i>                                | 0.94 (0.81-1.08)                                        | 0.99 (0.79-1.25)                                         | 0.97 (0.83-1.13)                                               |
| <i>Middle</i>                                | 0.80 (0.63- 1.02)                                       | 0.80 (0.57-1.14)                                         | 0.84 (0.65-1.10)                                               |
| <i>Richer</i>                                | 0.59 (0.43-0.81)*                                       | 0.76 (0.53-1.09)                                         | 0.47 (0.30-0.72)*                                              |
| <i>Richest</i>                               | 0.43 (0.35-0.55)*                                       | 0.53 (0.33-0.85)*                                        | 0.38 (0.31-0.47)*                                              |
| <b>Location of residency</b>                 |                                                         |                                                          |                                                                |
| <i>Urban</i>                                 | 1.00 (Ref.)                                             | 1.0 Ref.)                                                | 1.00 (Ref.)                                                    |
| <i>Rural</i>                                 | 0.82 (0.70-0.96)*                                       | 0.77(0.67-0.90)*                                         | 0.88 (0.72-1.08)                                               |
| <b>Mother working in last 12-<br/>months</b> |                                                         |                                                          |                                                                |
| <i>No</i>                                    | 1.00 (Ref.)                                             | 1.00 (Ref.)                                              | 1.0 (Ref.)                                                     |
| <i>Yes</i>                                   | 1.07 (0.94-1.20)                                        | 1.07 (0.90-1.28)                                         | 1.06 (0.95-1.20)                                               |

Note. OR: adjusted odds Ratio, \*: statistically significant (p-value > 0.05), 95%-CI: 95% Confidence Intervals, Ref.: reference category. The model is adjusted for the mean age of the mother's children, percentage of girls of



the mother's children, mothers age, number of children >5 living in households, whether the husband was living at home, and a country dummy.
